# Supplementary material for: Differentially expressed genes in orbital adipose/connective tissue of thyroid-associated orbitopathy
Source: PeerJ. 2023 Dec 18;11:e16569. doi: 10.7717/peerj.16569 (PMC10734407; doi:10.7717/peerj.16569)
Supplement: Supplemental Information 2 [file peerj-11-16569-s002.xlsx]

## Sheet: Sheet1
	Control P1	Control P2	Control P3	Control P4	Control P5	Control P6	TAO P1	TAO P2	TAO P3	TAO P4	TAO P5
Age(years)	26	29	21	59	34	27	59	58	43	56	80
Gender	Female	Female	Female	Female	Female	Male	Female	Female	Male	Male	Male
Eye separation	ou	ou	ou	os	od	od	os	od	od	od	od
Disease	(ou) Blepharochalasis	(ou) adipositas palpebrae	(ou) Blepharochalasis	(os) exotropia	(od) exotropia	(od) esotropia	(ou)TAO	(ou)TAO	(ou)TAO	(ou)TAO	(ou)TAO
Duration of thyroid disease prior to surgery(approx.mo)	N/A	N/A	N/A	N/A	N/A	N/A	9	504（42years）	12	12	24
Duration of TED prior to surgery(approx.mo)	N/A	N/A	N/A	N/A	N/A	N/A	5	12	4	4	4
Previous treatment for Grave’s disease	N/A	N/A	N/A	N/A	N/A	N/A	Antithyroid drugs	Thyroid surgery	Antithyroid drugs	Antithyroid drugs	Antithyroid drugs +Radioactive iodine therapy
Previous treatment for TED	N/A	N/A	N/A	N/A	N/A	N/A	Corticosteroid pulse therapy	(od)Disarticulation of inferior rectus	Corticosteroid pulse therapy	Corticosteroid pulse therapy+(od)Detachment of superior rectus	（os）orbital decompression
Smoking history	No	No	No	No	No	No	No	No	No	No	No
Exophthalmometry,hertel（mm）	N/A	N/A	N/A	N/A	N/A	N/A	23mm--<106mm>--25mm	20.5mm--<94mm>--15mm	25mm--<101mm>--24mm	15mm--<94mm>--14mm	14mm--<101mm>--10mm
Presence of compressive optic neuropathy	N/A	N/A	N/A	N/A	N/A	N/A	Yes	No	Yes	No	No
Surgery	(ou) Blepharoplasty	(ou) Blepharoplasty	(ou) Blepharoplasty	(os) Strabismus surgery	(od) Strabismus surgery	(od) Strabismus surgery	(os)orbital decompression	(od)orbital decompression	(od)orbital decompression	(od)orbital decompression	(od)orbital decompression
Clinical activity score(0-7)	N/A	N/A	N/A	N/A	N/A	N/A	1	1	3	2	1
N/A，not applicable
