# Supplementary material for: Differentially expressed genes in orbital adipose/connective tissue of thyroid-associated orbitopathy
Source: PeerJ. 2023 Dec 18;11:e16569. doi: 10.7717/peerj.16569 (PMC10734407; doi:10.7717/peerj.16569)
Supplement: Supplemental Information 3 [file peerj-11-16569-s003.xls]

## Sheet: Figure5A-1、B-3
raw data							Calculation process					Target: RSPO1	ΔCT	con	ΔΔCT	2^(-ΔΔCT)
Groups	Targets	CT(raw)	CT	CT mean			Name	Targets	CT mean	ΔCT		C-LR	4.19213	8.95478	-4.76266	27.1458
C-LR	ACTIN	26.5063	26.5063				C-LR	ACTIN	26.5201			C-MWJ	10.0845	8.95478	1.12974	0.456999
C-LR	ACTIN	26.6998						RSPO1	30.7122	4.19213		C-TJ	7.82505	8.95478	-1.12974	2.18819
C-LR	ACTIN	26.5339	26.5339	26.5201				ALPL	35.6081	9.08798		C-ZSQ	37.1281	8.95478	28.1733	3.30368e-09
C-LR	RSPO1	30.5358	30.5358					CP	35.4194	8.89935		T-HB	11.8025	8.95478	2.84771	0.138916
C-LR	RSPO1	30.8886	30.8886				C-MWJ	ACTIN	23.8303			T-WHL	7.15427	8.95478	-1.80051	3.48344
C-LR	RSPO1	31.7259		30.7122				RSPO1	33.9148	10.0845		T-YSM	11.8176	8.95478	2.86284	0.137467
C-LR	ALPL	35.93	35.93					ALPL	31.97	8.13975		T-ZYX	7.8416	8.95478	-1.11319	2.16323
C-LR	ALPL	35.2862	35.2862					CP	31.4059	7.57565
C-LR	ALPL	34.1369		35.6081			C-TJ	ACTIN	23.0794			Target: ALPL	ΔCT	con	ΔΔCT	2^(-ΔΔCT)
C-LR	CP	33.6449						RSPO2	30.9044	7.82505		C-LR	9.08798	8.61387	0.474112	0.71991
C-LR	CP	35.9422	35.9422					ALPL	32.3691	9.28973		C-MWJ	8.13975	8.61387	-0.474112	1.38906
C-LR	CP	34.8967	34.8967	35.4194				CP	29.3714	6.29207		C-TJ	9.28973	8.61387	0.675867	0.625956
C-MWJ	ACTIN	23.9532	23.9532				C-ZSQ	ACTIN	25.1365			C-ZSQ	6.55657	8.61387	-2.0573	4.16206
C-MWJ	ACTIN	23.7074	23.7074					RSPO2	37.1281	37.1281		T-HB	6.71018	8.61387	-1.90369	3.74168
C-MWJ	ACTIN	23.453		23.8303				ALPL	31.693	6.55657		T-WHL	7.93578	8.61387	-0.678086	1.60002
C-MWJ	RSPO1	32.4423						CP	33.5661	8.42966		T-YSM	6.06456	8.61387	-2.54931	5.85355
C-MWJ	RSPO1	33.7732	33.7732				T-HB	ACTIN	22.9986			T-ZYX	5.85865	8.61387	-2.75521	6.75153
C-MWJ	RSPO1	34.0564	34.0564	33.9148				RSPO3	34.8011	11.8025
C-MWJ	ALPL	31.9719	31.9719					ALPL	29.7088	6.71018		Target: CP	ΔCT	con	ΔΔCT	2^(-ΔΔCT)
C-MWJ	ALPL	31.9682	31.9682					CP	28.8518	5.85313		C-LR	8.89935	8.00265	0.896701	0.537113
C-MWJ	ALPL	32.3026		31.97			T-WHL	ACTIN	21.9684			C-MWJ	7.57565	8.00265	-0.427004	1.34444
C-MWJ	CP	31.5313	31.5313					RSPO3	29.1227	7.15427		C-TJ	6.29207	8.00265	-1.71058	3.27293
C-MWJ	CP	30.6486						ALPL	29.9042	7.93578		C-ZSQ	8.42966	8.00265	0.427004	0.743805
C-MWJ	CP	31.2806	31.2806	31.4059				CP	28.1254	6.15702		T-HB	5.85313	8.00265	-2.14953	4.43682
C-TJ	ACTIN	23.1116					T-YSM	ACTIN	19.3195			T-WHL	6.15702	8.00265	-1.84563	3.59409
C-TJ	ACTIN	23.0772	23.0772					RSPO4	31.1371	11.8176		T-YSM	5.17787	8.00265	-2.82478	7.08508
C-TJ	ACTIN	23.0815	23.0815	23.0794				ALPL	25.3841	6.06456		T-ZYX	5.54291	8.00265	-2.45974	5.50118
C-TJ	RSPO1	32.1992						CP	24.4974	5.17787
C-TJ	RSPO1	31.2436	31.2436				T-ZYX	ACTIN	22.2571
C-TJ	RSPO1	30.5652	30.5652	30.9044				RSPO4	30.0987	7.8416
C-TJ	ALPL	32.8246						ALPL	28.1158	5.85865
C-TJ	ALPL	32.3132	32.3132					CP	27.8	5.54291
C-TJ	ALPL	32.425	32.425	32.3691
C-TJ	CP	29.3871	29.3871
C-TJ	CP	29.1694
C-TJ	CP	29.3558	29.3558	29.3714
C-ZSQ	ACTIN	25.4883
C-ZSQ	ACTIN	25.1469	25.1469
C-ZSQ	ACTIN	25.126	25.126	25.1365
C-ZSQ	RSPO1	35.7968
C-ZSQ	RSPO1	37.6186	37.6186
C-ZSQ	RSPO1	36.6375	36.6375	37.1281
C-ZSQ	ALPL	31.7498	31.7498
C-ZSQ	ALPL	31.6363	31.6363
C-ZSQ	ALPL	31.2061		31.693
C-ZSQ	CP	33.5961	33.5961
C-ZSQ	CP	33.5361	33.5361
C-ZSQ	CP	33.3476		33.5661
T-HB	ACTIN	23.2482
T-HB	ACTIN	22.9301	22.9301
T-HB	ACTIN	23.0672	23.0672	22.9986
T-HB	RSPO1	34.3709	34.3709
T-HB	RSPO1	35.2313	35.2313
T-HB	RSPO1	36.9933		34.8011
T-HB	ALPL	29.6748	29.6748
T-HB	ALPL	29.5984
T-HB	ALPL	29.7428	29.7428	29.7088
T-HB	CP	28.7459	28.7459
T-HB	CP	28.3836
T-HB	CP	28.9576	28.9576	28.8518
T-WHL	ACTIN	22.0894
T-WHL	ACTIN	21.9742	21.9742
T-WHL	ACTIN	21.9626	21.9626	21.9684
T-WHL	RSPO1	29.0355	29.0355
T-WHL	RSPO1	29.2098	29.2098
T-WHL	RSPO1	29.5341		29.1227
T-WHL	ALPL	29.8771	29.8771
T-WHL	ALPL	29.9313	29.9313
T-WHL	ALPL	30.2131		29.9042
T-WHL	CP	28.1378	28.1378
T-WHL	CP	28.1131	28.1131
T-WHL	CP	27.9465		28.1254
T-YSM	ACTIN	19.4174	19.4174
T-YSM	ACTIN	19.0145
T-YSM	ACTIN	19.2216	19.2216	19.3195
T-YSM	RSPO1	31.3158	31.3158
T-YSM	RSPO1	31.6745
T-YSM	RSPO1	30.9585	30.9585	31.1371
T-YSM	ALPL	25.386	25.386
T-YSM	ALPL	25.7861
T-YSM	ALPL	25.3821	25.3821	25.3841
T-YSM	CP	24.5194	24.5194
T-YSM	CP	24.4753	24.4753
T-YSM	CP	24.7197		24.4974
T-ZYX	ACTIN	22.5179
T-ZYX	ACTIN	22.2702	22.2702
T-ZYX	ACTIN	22.2441	22.2441	22.2571
T-ZYX	RSPO1	29.9633	29.9633
T-ZYX	RSPO1	30.7452
T-ZYX	RSPO1	30.2341	30.2341	30.0987
T-ZYX	ALPL	28.0796	28.0796
T-ZYX	ALPL	28.1519	28.1519
T-ZYX	ALPL	27.9962		28.1158
T-ZYX	CP	27.7636	27.7636
T-ZYX	CP	27.8365	27.8365
T-ZYX	CP	28.051		27.8

## Sheet: Figure5A-2
raw data							Calculation process					Target: GPX3	ΔCT	con	ΔΔCT	2^(-ΔΔCT)
Groups	Targets	CT(raw)	CT	CT mean			Name	Targets	CT mean	ΔCT		C-LR	3.82322	4.52528	-0.702057	1.62682
C-LR	ACTIN	26.8442					C-LR	ACTIN	26.2561			C-MWJ	5.22733	4.52528	0.702057	0.614695
C-LR	ACTIN	26.3111	26.3111					BPIFB4	Undetermined			C-TJ	5.53342	4.52528	1.00814	0.497185
C-LR	ACTIN	26.2011	26.2011	26.2561				GPX3	30.0793	3.82322		C-ZSQ	0.818876	4.52528	-3.7064	13.0538
C-LR	BPIFB4	Undetermined	Undetermined					KCNK10	31.8677	5.61155		T-HB	-0.0505285	4.52528	-4.57581	23.8482
C-LR	BPIFB4	Undetermined	Undetermined				C-MWJ	ACTIN	24.6045			T-WHL	6.31036	4.52528	1.78508	0.29016
C-LR	BPIFB4	Undetermined	Undetermined					BPIFB4	Undetermined			T-YSM	3.23252	4.52528	-1.29276	2.44996
C-LR	GPX3	29.5665						GPX3	29.8319	5.22733		T-ZYX	1.64691	4.52528	-2.87837	7.35318
C-LR	GPX3	30.0835	30.0835					KCNK10	31.9607	7.35619
C-LR	GPX3	30.0751	30.0751	30.0793			C-TJ	ACTIN	24.3787			Target: KCNK10	ΔCT	con	ΔΔCT	2^(-ΔΔCT)
C-LR	KCNK10	32.9311						BPIFB4				C-LR	5.61155	6.58195	-0.970396	1.95938
C-LR	KCNK10	31.7478	31.7478					GPX3	29.9121	5.53342		C-MWJ	7.35619	6.58195	0.774242	0.584696
C-LR	KCNK10	31.9875	31.9875	31.8677				KCNK10	31.9311	7.55234		C-TJ	7.55234	6.58195	0.970396	0.510366
C-MWJ	ACTIN	24.575	24.575				C-ZSQ	ACTIN	31.8985			C-ZSQ	1.63707	6.58195	-4.94488	30.8004
C-MWJ	ACTIN	24.634	24.634					BPIFB4	Undetermined			T-HB	9.35987	6.58195	2.77792	0.145802
C-MWJ	ACTIN	24.2758		24.6045				GPX3	32.7173	0.818876		T-WHL	10.1194	6.58195	3.53742	0.086125
C-MWJ	BPIFB4	Undetermined	Undetermined					KCNK10	33.5355	1.63707		T-YSM	10.5155	6.58195	3.93356	0.0654457
C-MWJ	BPIFB4	Undetermined	Undetermined				T-HB	ACTIN	23.4026			T-ZYX	8.14187	6.58195	1.55992	0.33917
C-MWJ	BPIFB4	Undetermined	Undetermined					BPIFB4	34.3151	10.9124
C-MWJ	GPX3	29.7941	29.7941					GPX3	23.3521	-0.0505285
C-MWJ	GPX3	29.8696	29.8696					KCNK10	32.7625	9.35987
C-MWJ	GPX3	29.6601		29.8319			T-WHL	ACTIN	22.8745
C-MWJ	KCNK10	31.9566	31.9566					BPIFB4	32.8637	9.98925
C-MWJ	KCNK10	32.1789						GPX3	29.1848	6.31036
C-MWJ	KCNK10	31.9648	31.9648	31.9607				KCNK10	32.9939	10.1194
C-TJ	ACTIN	24.5741					T-YSM	ACTIN	21.0784
C-TJ	ACTIN	24.3792	24.3792					BPIFB4	32.8663	11.7879
C-TJ	ACTIN	24.3783	24.3783	24.3787				GPX3	24.3109	3.23252
C-TJ	BPIFB4	Undetermined	Undetermined					KCNK10	31.5939	10.5155
C-TJ	BPIFB4	Undetermined	Undetermined				T-ZYX	ACTIN	23.5061
C-TJ	BPIFB4	Undetermined	Undetermined					BPIFB4	35.593	12.0868
C-TJ	GPX3	29.9457	29.9457					GPX3	25.1531	1.64691
C-TJ	GPX3	29.8786	29.8786					KCNK10	31.648	8.14187
C-TJ	GPX3	29.6049		29.9121
C-TJ	KCNK10	32.2768
C-TJ	KCNK10	31.9213	31.9213
C-TJ	KCNK10	31.9409	31.9409	31.9311
C-ZSQ	ACTIN	32.1588
C-ZSQ	ACTIN	31.9821	31.9821
C-ZSQ	ACTIN	31.8148	31.8148	31.8985
C-ZSQ	BPIFB4	Undetermined	Undetermined
C-ZSQ	BPIFB4	Undetermined	Undetermined
C-ZSQ	BPIFB4	Undetermined	Undetermined
C-ZSQ	GPX3	32.7705	32.7705
C-ZSQ	GPX3	32.6642	32.6642
C-ZSQ	GPX3	32.4015		32.7173
C-ZSQ	KCNK10	33.4788	33.4788
C-ZSQ	KCNK10	33.5922	33.5922
C-ZSQ	KCNK10	33.9401		33.5355
T-HB	ACTIN	23.9283	23.9283
T-HB	ACTIN	22.877	22.877
T-HB	ACTIN	23.5283		23.4026
T-HB	BPIFB4	34.1533	34.1533
T-HB	BPIFB4	34.4768	34.4768
T-HB	BPIFB4	34.9338		34.3151
T-HB	GPX3	23.0894
T-HB	GPX3	23.767	23.767
T-HB	GPX3	22.9372	22.9372	23.3521
T-HB	KCNK10	32.0409
T-HB	KCNK10	32.9941	32.9941
T-HB	KCNK10	32.5308	32.5308	32.7625
T-WHL	ACTIN	23.2148
T-WHL	ACTIN	22.9691	22.9691
T-WHL	ACTIN	22.7799	22.7799	22.8745
T-WHL	BPIFB4	32.9297	32.9297
T-WHL	BPIFB4	32.7977	32.7977
T-WHL	BPIFB4	33.3456		32.8637
T-WHL	GPX3	29.4071
T-WHL	GPX3	29.1453	29.1453
T-WHL	GPX3	29.2244	29.2244	29.1848
T-WHL	KCNK10	32.9466	32.9466
T-WHL	KCNK10	33.2622
T-WHL	KCNK10	33.0411	33.0411	32.9939
T-YSM	ACTIN	21.5177
T-YSM	ACTIN	21.0478	21.0478
T-YSM	ACTIN	21.109	21.109	21.0784
T-YSM	BPIFB4	32.5785
T-YSM	BPIFB4	32.7773	32.7773
T-YSM	BPIFB4	32.9553	32.9553	32.8663
T-YSM	GPX3	24.3202	24.3202
T-YSM	GPX3	24.3016	24.3016
T-YSM	GPX3	24.2792		24.3109
T-YSM	KCNK10	31.6523	31.6523
T-YSM	KCNK10	31.5355	31.5355
T-YSM	KCNK10	31.2678		31.5939
T-ZYX	ACTIN	24.2866
T-ZYX	ACTIN	23.6643	23.6643
T-ZYX	ACTIN	23.348	23.348	23.5061
T-ZYX	BPIFB4	33.9645
T-ZYX	BPIFB4	35.5418	35.5418
T-ZYX	BPIFB4	35.6441	35.6441	35.593
T-ZYX	GPX3	25.1865	25.1865
T-ZYX	GPX3	25.1197	25.1197
T-ZYX	GPX3	25.0437		25.1531
T-ZYX	KCNK10	31.2579
T-ZYX	KCNK10	31.7629	31.7629
T-ZYX	KCNK10	31.5332	31.5332	31.648

## Sheet: Figure5A-3
raw data							Calculation process					Target: SERPINA3	ΔCT	con	ΔΔCT	2^(-ΔΔCT)
Groups	Targets	CT(raw)	CT	CT mean			Name	Targets	CT mean	ΔCT		C-LR	9.45941	10.215	-0.755559	1.68829
C-LR	ACTIN	26.3027	26.3027				C-LR	ACTIN	26.2831			C-MWJ	10.9705	10.215	0.755559	0.592317
C-LR	ACTIN	26.4906						SERPINA3	35.7425	9.45941		C-TJ	11.4735	10.215	1.25857	0.417959
C-LR	ACTIN	26.2635	26.2635	26.2831				ACAN	33.8397	7.55663		C-ZSQ	6.15588	10.215	-4.05909	16.6689
C-LR	SERPINA3	34.3496						AGT	31.8435	5.56037		T-HB	3.81641	10.215	-6.39855	84.3639
C-LR	SERPINA3	35.6274	35.6274				C-MWJ	ACTIN	24.5228			T-WHL	10.4345	10.215	0.2195	0.858863
C-LR	SERPINA3	35.8576	35.8576	35.7425				SERPINA3	35.4933	10.9705		T-YSM	5.77792	10.215	-4.43705	21.6613
C-LR	ACAN	33.7773	33.7773					ACAN	32.4044	7.88155		T-ZYX	5.4066	10.215	-4.80837	28.0196
C-LR	ACAN	33.9022	33.9022	33.8397				AGT	31.4828	6.95999
C-LR	ACAN	31.3197	31.3197				C-TJ	ACTIN	24.2556			Target: ACAN	ΔCT	con	ΔΔCT	2^(-ΔΔCT)
C-LR	AGT	30.3085	30.3085	31.8435				SERPINA3	35.7292	11.4735		C-LR	7.55663	7.71909	-0.162461	1.11919
C-MWJ	ACTIN	24.3569						ACAN	32.9003	8.6447		C-MWJ	7.88155	7.71909	0.162461	0.893499
C-MWJ	ACTIN	24.5262	24.5262					AGT	29.9391	5.68347		C-TJ	8.6447	7.71909	0.925609	0.526458
C-MWJ	ACTIN	24.5194	24.5194	24.5228			C-ZSQ	ACTIN	30.6785			C-ZSQ	5.2961	7.71909	-2.42299	5.36281
C-MWJ	SERPINA3	35.4175	35.4175					SERPINA3	36.8344	6.15588		T-HB	4.12197	7.71909	-3.59712	12.1015
C-MWJ	SERPINA3	35.7188						ACAN	35.9746	5.2961		T-WHL	5.41951	7.71909	-2.29958	4.92315
C-MWJ	SERPINA3	35.5692	35.5692	35.4933				AGT	37.0091	6.33059		T-YSM	8.66614	7.71909	0.947055	0.51869
C-MWJ	ACAN	32.311	32.311				T-HB	ACTIN	23.604			T-ZYX	4.47991	7.71909	-3.23918	9.44256
C-MWJ	ACAN	Undetermined	Undetermined					SERPINA3	27.4204	3.81641
C-MWJ	ACAN	32.4977	32.4977	32.4044				ACAN	27.7259	4.12197		Target: AGT	ΔCT	con	ΔΔCT	2^(-ΔΔCT)
C-MWJ	AGT	31.2606	31.2606					AGT	27.2532	3.6492		C-LR	5.56037	6.00703	-0.446665	1.36289
C-MWJ	AGT	30.5898					T-WHL	ACTIN	22.9364			C-MWJ	6.95999	6.00703	0.952956	0.516573
C-MWJ	AGT	31.705	31.705	31.4828				SERPINA3	33.3708	10.4345		C-TJ	5.68347	6.00703	-0.323558	1.25141
C-TJ	ACTIN	24.2069	24.2069					ACAN	28.3559	5.41951		C-ZSQ	6.33059	6.00703	0.323558	0.799097
C-TJ	ACTIN	24.4307						AGT	26.93	3.99365		T-HB	3.6492	6.00703	-2.35783	5.12598
C-TJ	ACTIN	24.3044	24.3044	24.2556			T-YSM	ACTIN	21.1178			T-WHL	3.99365	6.00703	-2.01338	4.03727
C-TJ	SERPINA3	35.592	35.592					SERPINA3	26.8957	5.77792		T-YSM	2.64865	6.00703	-3.35838	10.2559
C-TJ	SERPINA3	34.5552						ACAN	29.7839	8.66614		T-ZYX	2.43874	6.00703	-3.56829	11.8621
C-TJ	SERPINA3	35.8663	35.8663	35.7292				AGT	23.7665	2.64865
C-TJ	ACAN	32.9751	32.9751				T-ZYX	ACTIN	23.8763
C-TJ	ACAN	32.8255	32.8255					SERPINA3	29.2829	5.4066
C-TJ	ACAN	32.4362		32.9003				ACAN	28.3562	4.47991
C-TJ	AGT	29.9348	29.9348					AGT	26.315	2.43874
C-TJ	AGT	29.8416
C-TJ	AGT	29.9434	29.9434	29.9391
C-ZSQ	ACTIN	30.3915	30.3915
C-ZSQ	ACTIN	30.9655	30.9655
C-ZSQ	ACTIN	31.6692		30.6785
C-ZSQ	SERPINA3	35.9316
C-ZSQ	SERPINA3	36.6068	36.6068
C-ZSQ	SERPINA3	37.062	37.062	36.8344
C-ZSQ	ACAN	Undetermined	Undetermined
C-ZSQ	ACAN	36.4372	36.4372
C-ZSQ	ACAN	35.512	35.512	35.9746
C-ZSQ	AGT	37.0365	37.0365
C-ZSQ	AGT	36.9817	36.9817
C-ZSQ	AGT	35.0658		37.0091
T-HB	ACTIN	23.6663	23.6663
T-HB	ACTIN	23.5416	23.5416
T-HB	ACTIN	23.8508		23.604
T-HB	SERPINA3	27.3381	27.3381
T-HB	SERPINA3	27.5027	27.5027	27.4204
T-HB	AGT	26.9188	26.9188	27.2532
T-HB	ACAN	28.7564	28.7564	27.7259
T-WHL	ACTIN	22.92	22.92
T-WHL	ACTIN	22.8865
T-WHL	ACTIN	22.9527	22.9527	22.9364
T-WHL	SERPINA3	34.0157
T-WHL	SERPINA3	33.3085	33.3085
T-WHL	SERPINA3	33.4331	33.4331	33.3708
T-WHL	ACAN	28.2303	28.2303
T-WHL	ACAN	28.4814	28.4814
T-WHL	ACAN	27.9314		28.3559
T-WHL	AGT	26.9707	26.9707
T-WHL	AGT	27.0743
T-WHL	AGT	26.8893	26.8893	26.93
T-YSM	ACTIN	21.308
T-YSM	ACTIN	21.0632	21.0632
T-YSM	ACTIN	21.1724	21.1724	21.1178
T-YSM	SERPINA3	26.8988	26.8988
T-YSM	SERPINA3	26.8927	26.8927
T-YSM	SERPINA3	26.792		26.8957
T-YSM	ACAN	29.8411	29.8411
T-YSM	ACAN	29.5425
T-YSM	ACAN	29.7268	29.7268	29.7839
T-YSM	AGT	23.7376	23.7376
T-YSM	AGT	23.7954	23.7954
T-YSM	AGT	23.9876		23.7665
T-ZYX	ACTIN	23.8459	23.8459
T-ZYX	ACTIN	23.4583
T-ZYX	ACTIN	23.9066	23.9066	23.8763
T-ZYX	SERPINA3	29.3078	29.3078
T-ZYX	SERPINA3	29.0817
T-ZYX	SERPINA3	29.258	29.258	29.2829
T-ZYX	ACAN	28.4699	28.4699
T-ZYX	ACAN	27.8938
T-ZYX	ACAN	28.2425	28.2425	28.3562
T-ZYX	AGT	26.3481	26.3481
T-ZYX	AGT	26.2819	26.2819
T-ZYX	AGT	26.9499		26.315

## Sheet: Figure5A4
raw data							Calculation process					Target: OLFM4	ΔCT	con	ΔΔCT	2^(-ΔΔCT)
Groups	Targets	CT(raw)	CT	CT mean			Name	Targets	CT mean	ΔCT		C-LR	4.03101	8.2191	-4.18809	18.2281
C-LR	ACTIN	25.911	25.911				C-LR	ACTIN	25.935			C-MWJ	9.45874	8.2191	1.23964	0.423478
C-LR	ACTIN	26.0826	26.0826					OLFM4	29.9661	4.03101		C-TJ	6.97946	8.2191	-1.23964	2.3614
C-LR	ACTIN	25.8116	25.8116	25.935								C-ZSQ	13.7415	8.2191	5.52245	0.0217559
C-LR	OLFM4	29.9255	29.9255									T-HB	10.2985	8.2191	2.0794	0.236612
C-LR	OLFM4	29.6941					C-MWJ	ACTIN	22.5781			T-WHL	6.76779	8.2191	-1.4513	2.73455
C-LR	OLFM4	30.0066	30.0066	29.9661				OLFM4	32.0368	9.45874		T-YSM	8.74206	8.2191	0.522959	0.695943
C-MWJ	ACTIN	22.6193	22.6193									T-ZYX	9.84826	8.2191	1.62916	0.323276
C-MWJ	ACTIN	22.4538
C-MWJ	ACTIN	22.5369	22.5369	22.5781			C-TJ	ACTIN	22.2955
C-MWJ	OLFM4	32.2821	32.2821					OLFM4	29.2749	6.97946
C-MWJ	OLFM4	31.7915	31.7915
C-MWJ	OLFM4	29.2845		32.0368
C-TJ	ACTIN	22.5139					C-ZSQ	ACTIN	24.2086
C-TJ	ACTIN	22.2241	22.2241					OLFM4	37.9501	13.7415
C-TJ	ACTIN	22.3668	22.3668	22.2955
C-TJ	OLFM4	29.3416	29.3416
C-TJ	OLFM4	29.2082	29.2082				T-HB	ACTIN	21.7324
C-TJ	OLFM4	28.3837		29.2749				OLFM4	32.0309	10.2985
C-ZSQ	ACTIN	24.8346
C-ZSQ	ACTIN	24.1098	24.1098
C-ZSQ	ACTIN	24.3074	24.3074	24.2086			T-WHL	ACTIN	21.7182
C-ZSQ	OLFM4	38.88	38.88					OLFM4	28.486	6.76779
C-ZSQ	OLFM4	37.0203	37.0203
C-ZSQ	OLFM4	Undetermined		37.9501
T-HB	ACTIN	22.5426					T-YSM	ACTIN	18.6235
T-HB	ACTIN	21.7376	21.7376					OLFM4	27.3655	8.74206
T-HB	ACTIN	21.7272	21.7272	21.7324
T-HB	OLFM4	32.6606
T-HB	OLFM4	31.9242	31.9242				T-ZYX	ACTIN	22.7103
T-HB	OLFM4	32.1376	32.1376	32.0309				OLFM4	32.5585	9.84826
T-WHL	ACTIN	21.8991
T-WHL	ACTIN	21.7	21.7
T-WHL	ACTIN	21.7365	21.7365	21.7182
T-WHL	OLFM4	28.3002	28.3002
T-WHL	OLFM4	28.6718	28.6718
T-WHL	OLFM4	29.4372		28.486
T-YSM	ACTIN	19.1103
T-YSM	ACTIN	18.6661	18.6661
T-YSM	ACTIN	18.5809	18.5809	18.6235
T-YSM	OLFM4	28.8955
T-YSM	OLFM4	27.7291	27.7291
T-YSM	OLFM4	27.002	27.002	27.3655
T-ZYX	ACTIN	24.2255
T-ZYX	ACTIN	22.8187	22.8187
T-ZYX	ACTIN	22.6018	22.6018	22.7103
T-ZYX	OLFM4	29.0396
T-ZYX	OLFM4	31.8917	31.8917
T-ZYX	OLFM4	33.2253	33.2253	32.5585

## Sheet: Figure5B-1
raw data							Calculation process					Target: MAB21L1	ΔCT	con	ΔΔCT	2^(-ΔΔCT)
Groups	Targets	CT(raw)	CT	CT mean			Name	Targets	CT mean	ΔCT		C-LR	3.04811	2.73159	0.31652	0.803005
C-LR	ACTIN	22.501	22.501				C-LR	ACTIN	22.4921			C-MWJ	2.39454	2.73159	-0.337048	1.26317
C-LR	ACTIN	22.4832	22.4832					MAB21L1	25.5402	3.04811		C-TJ	3.63266	2.73159	0.90107	0.53549
C-LR	ACTIN	22.0027		22.4921				POU3F3	32.0662	9.57408		C-ZSQ	2.41507	2.73159	-0.31652	1.24532
C-MWJ	ACTIN	23.1856						TPO	27.527	5.03491		T-HB	4.86132	2.73159	2.12973	0.228501
C-MWJ	ACTIN	22.9179	22.9179				C-MWJ	ACTIN	22.8937			T-WHL	7.1661	2.73159	4.43451	0.0462466
C-MWJ	ACTIN	22.8695	22.8695	22.8937				MAB21L1	25.2882	2.39454		T-YSM	9.0827	2.73159	6.35111	0.0122497
C-TJ	ACTIN	23.0684	23.0684					POU3F3	33.2685	10.3748		T-ZYX	5.88493	2.73159	3.15333	0.112396
C-TJ	ACTIN	22.9957						TPO	36.9937	14.1
C-TJ	ACTIN	23.0573	23.0573	23.0629			C-TJ	ACTIN	23.0629
C-ZSQ	ACTIN	24.9168						MAB21L1	26.6955	3.63266		Target: TPO	ΔCT	con	ΔΔCT	2^(-ΔΔCT)
C-ZSQ	ACTIN	24.6221	24.6221					POU3F3	33.6994	10.6365		C-LR	5.03491	5.89414	-0.859227	1.81407
C-ZSQ	ACTIN	24.7659	24.7659	24.694				TPO	29.2769	6.21408		C-MWJ	14.1	5.89414	8.20584	0.00338684
T-HB	ACTIN	22.9227					C-ZSQ	ACTIN	24.694			C-TJ	6.21408	5.89414	0.319935	0.801106
T-HB	ACTIN	22.5382	22.5382					MAB21L1	27.1091	2.41507		C-ZSQ	5.57421	5.89414	-0.319935	1.24827
T-HB	ACTIN	22.5619	22.5619	22.5501				POU3F3	33.6566	8.96265		T-HB	Undetermined	5.89414
T-WHL	ACTIN	22.2286						TPO	30.2682	5.57421		T-WHL	Undetermined	5.89414
T-WHL	ACTIN	21.9404	21.9404				T-HB	ACTIN	22.5501			T-YSM	8.53156	5.89414	2.63741	0.160716
T-WHL	ACTIN	21.9219	21.9219	21.9311				MAB21L1	27.4114	4.86132		T-ZYX	7.73797	5.89414	1.84383	0.278581
T-YSM	ACTIN	19.408						POU3F3	34.3162	11.7661
T-YSM	ACTIN	18.995	18.995					TPO	Undetermined			Target:POU3F3	ΔCT	con	ΔΔCT	2^(-ΔΔCT)
T-YSM	ACTIN	19.0536	19.0536	19.0243			T-WHL	ACTIN	21.9311			C-LR	9.57408	9.97445	0.400376	0.757661
T-ZYX	ACTIN	22.7239						MAB21L1	29.0972	7.1661		C-MWJ	10.3748	9.97445	-0.400376	1.31985
T-ZYX	ACTIN	22.3778	22.3778					POU3F3	33.2168	11.2857		C-TJ	10.6365	9.97445	-0.662054	1.58233
T-ZYX	ACTIN	22.2733	22.2733	22.3255				TPO	Undetermined			C-ZSQ	8.96265	9.97445	1.0118	0.495926
C-LR	MAB21L1	25.4997	25.4997				T-YSM	ACTIN	19.0243			T-HB	11.7661	9.97445	-1.79164	3.46207
C-LR	MAB21L1	25.5808	25.5808					MAB21L1	28.107	9.0827		T-WHL	11.2857	9.97445	-1.31123	2.48152
C-LR	MAB21L1	28.9456		25.5402				POU3F3	34.6434	15.6192		T-YSM	15.6192	9.97445	-5.6447	50.0294
C-MWJ	MAB21L1	25.3253	25.3253					TPO	27.5558	8.53156		T-ZYX	11.0422	9.97445	-1.0677	2.0961
C-MWJ	MAB21L1	25.0886					T-ZYX	ACTIN	22.3255
C-MWJ	MAB21L1	25.2512	25.2512	25.2882				MAB21L1	28.2105	5.88493
C-TJ	MAB21L1	26.6656	26.6656					POU3F3	33.3677	11.0422
C-TJ	MAB21L1	26.7254	26.7254					TPO	30.0635	7.73797
C-TJ	MAB21L1	26.6019		26.6955
C-ZSQ	MAB21L1	27.107	27.107
C-ZSQ	MAB21L1	27.1111	27.1111
C-ZSQ	MAB21L1	27.4282		27.1091
T-HB	MAB21L1	27.1932
T-HB	MAB21L1	27.3923	27.3923
T-HB	MAB21L1	27.4304	27.4304	27.4114
T-WHL	MAB21L1	29.4564
T-WHL	MAB21L1	29.0662	29.0662
T-WHL	MAB21L1	29.1282	29.1282	29.0972
T-YSM	MAB21L1	28.1259	28.1259
T-YSM	MAB21L1	27.9143
T-YSM	MAB21L1	28.0881	28.0881	28.107
T-ZYX	MAB21L1	28.162	28.162
T-ZYX	MAB21L1	28.2589	28.2589
T-ZYX	MAB21L1	28.3953		28.2105
C-LR	POU3F3	31.9094	31.9094
C-LR	POU3F3	32.6707
C-LR	POU3F3	32.223	32.223	32.0662
C-MWJ	POU3F3	32.3137
C-MWJ	POU3F3	32.935	32.935
C-MWJ	POU3F3	33.602	33.602	33.2685
C-TJ	POU3F3	33.7669	33.7669
C-TJ	POU3F3	33.4783
C-TJ	POU3F3	33.6319	33.6319	33.6994
C-ZSQ	POU3F3	33.519	33.519
C-ZSQ	POU3F3	33.7943	33.7943
C-ZSQ	POU3F3	34.439		33.6566
T-HB	POU3F3	33.8125
T-HB	POU3F3	34.1559	34.1559
T-HB	POU3F3	34.4764	34.4764	34.3162
T-WHL	POU3F3	33.1608	33.1608
T-WHL	POU3F3	33.8208
T-WHL	POU3F3	33.2728	33.2728	33.2168
T-YSM	POU3F3	33.5291
T-YSM	POU3F3	34.5867	34.5867
T-YSM	POU3F3	34.7002	34.7002	34.6434
T-ZYX	POU3F3	33.4358	33.4358
T-ZYX	POU3F3	33.2996	33.2996
T-ZYX	POU3F3	32.7069		33.3677
C-LR	TPO	27.7711
C-LR	TPO	27.5575	27.5575
C-LR	TPO	27.4966	27.4966	27.527
C-MWJ	TPO	Undetermined	Undetermined
C-MWJ	TPO	Undetermined	Undetermined
C-MWJ	TPO	36.9937	36.9937	36.9937
C-TJ	TPO	29.4191	29.4191
C-TJ	TPO	29.7529
C-TJ	TPO	29.1348	29.1348	29.2769
C-ZSQ	TPO	30.6938
C-ZSQ	TPO	30.3995	30.3995
C-ZSQ	TPO	30.1369	30.1369	30.2682
T-HB	TPO	Undetermined	Undetermined
T-HB	TPO	Undetermined	Undetermined
T-HB	TPO	Undetermined	Undetermined
T-WHL	TPO	Undetermined	Undetermined
T-WHL	TPO	Undetermined	Undetermined
T-WHL	TPO	Undetermined	Undetermined
T-YSM	TPO	27.6707	27.6707
T-YSM	TPO	27.441	27.441
T-YSM	TPO	26.9766		27.5558
T-ZYX	TPO	30.1275	30.1275
T-ZYX	TPO	29.9995	29.9995
T-ZYX	TPO	30.4489		30.0635

## Sheet: Figure5B-2
raw data							Calculation process					Target: CLVS2	ΔCT	con	ΔΔCT	2^(-ΔΔCT)
Groups	Targets	CT(raw)	CT	CT mean			Name	Targets	CT mean	ΔCT		C-LR	8.1478	7.40314	0.744658	0.596809
C-LR	ACTIN	22.7021	22.7021				C-LR	ACTIN	22.7385			C-MWJ	7.1905	7.40314	-0.212642	1.15881
C-LR	ACTIN	22.7749	22.7749					CLVS2	30.8863	8.1478		C-TJ	7.61579	7.40314	0.212642	0.862956
C-LR	ACTIN	22.5991		22.7385				PIK3C2G	28.8705	6.13197		C-ZSQ	6.37636	7.40314	-1.02679	2.03748
C-MWJ	ACTIN	23.6767	23.6767					SIGLEC14	31.9635	9.22503		T-HB	8.21918	7.40314	0.816032	0.568002
C-MWJ	ACTIN	23.7514	23.7514				C-MWJ	ACTIN	23.7141			T-WHL	8.73907	7.40314	1.33592	0.396139
C-MWJ	ACTIN	23.0356		23.7141				CLVS2	30.9046	7.1905		T-YSM	13.297	7.40314	5.89382	0.0168183
C-TJ	ACTIN	23.7522						PIK3C2G	30.6569	6.94286		T-ZYX	8.27715	7.40314	0.874007	0.545629
C-TJ	ACTIN	23.6274	23.6274					SIGLEC14	32.5138	8.79977
C-TJ	ACTIN	23.6398	23.6398	23.6336			C-TJ	ACTIN	23.6336
C-ZSQ	ACTIN	25.9265						CLVS2	31.2494	7.61579		Target: PIK3C2G	ΔCT	con	ΔΔCT	2^(-ΔΔCT)
C-ZSQ	ACTIN	25.5823	25.5823					PIK3C2G	28.3777	4.74408		C-LR	6.13197	6.496	-0.364035	1.28702
C-ZSQ	ACTIN	25.2754	25.2754	25.4288				SIGLEC14	36.609	12.9754		C-MWJ	6.94286	6.496	0.446853	0.733641
T-HB	ACTIN	23.5383					C-ZSQ	ACTIN	25.4288			C-TJ	4.74408	6.496	-1.75193	3.36808
T-HB	ACTIN	23.2053	23.2053					CLVS2	31.8052	6.37636		C-ZSQ	6.86004	6.496	0.364035	0.776988
T-HB	ACTIN	23.2408	23.2408	23.223				PIK3C2G	32.2889	6.86004		T-HB	13.1314	6.496	6.63538	0.0100589
T-WHL	ACTIN	22.6014	22.6014					SIGLEC14	33.9095	8.48062		T-WHL	9.83131	6.496	3.33531	0.099077
T-WHL	ACTIN	22.4885	22.4885				T-HB	ACTIN	23.223			T-YSM	12.1052	6.496	5.60916	0.0204868
T-WHL	ACTIN	22.2343		22.5449				CLVS2	31.4422	8.21918		T-ZYX	11.519	6.496	5.02303	0.0307552
T-YSM	ACTIN	19.7965						PIK3C2G	36.3544	13.1314
T-YSM	ACTIN	19.5011	19.5011					SIGLEC14	Undetermined
T-YSM	ACTIN	19.4946	19.4946	19.4978			T-WHL	ACTIN	22.5449			Target: SIGLEC14	ΔCT	con	ΔΔCT	2^(-ΔΔCT)
T-ZYX	ACTIN	22.9748						CLVS2	31.284	8.73907		C-LR	9.22503	9.0124	0.21263	0.862962
T-ZYX	ACTIN	22.7831	22.7831					PIK3C2G	32.3762	9.83131		C-MWJ	8.79977	9.0124	-0.21263	1.1588
T-ZYX	ACTIN	22.7412	22.7412	22.7621				SIGLEC14	33.0404	10.4954		C-TJ	12.9754	9.0124	3.96302	0.0641227
C-LR	CLVS2	31.0048	31.0048				T-YSM	ACTIN	19.4978			C-ZSQ	8.48062	9.0124	-0.531778	1.44571
C-LR	CLVS2	30.7678	30.7678					CLVS2	32.7948	13.297		T-HB		9.0124	-9.0124
C-LR	CLVS2	30.449		30.8863				PIK3C2G	31.603	12.1052		T-WHL	10.4954	9.0124	1.48302	0.357739
C-MWJ	CLVS2	30.8365	30.8365					SIGLEC14	Undetermined			T-YSM		9.0124	-9.0124
C-MWJ	CLVS2	30.5509					T-ZYX	ACTIN	22.7621			T-ZYX		9.0124	-9.0124
C-MWJ	CLVS2	30.9726	30.9726	30.9046				CLVS2	31.0393	8.27715
C-TJ	CLVS2	30.8745						PIK3C2G	34.2812	11.519
C-TJ	CLVS2	31.2236	31.2236					SIGLEC14	Undetermined
C-TJ	CLVS2	31.2752	31.2752	31.2494
C-ZSQ	CLVS2	31.264
C-ZSQ	CLVS2	31.7973	31.7973
C-ZSQ	CLVS2	31.8131	31.8131	31.8052
T-HB	CLVS2	31.3587	31.3587
T-HB	CLVS2	31.5257	31.5257
T-HB	CLVS2	31.9366		31.4422
T-WHL	CLVS2	31.3268	31.3268
T-WHL	CLVS2	31.6392
T-WHL	CLVS2	31.2412	31.2412	31.284
T-YSM	CLVS2	31.8312
T-YSM	CLVS2	32.89	32.89
T-YSM	CLVS2	32.6996	32.6996	32.7948
T-ZYX	CLVS2	30.9316
T-ZYX	CLVS2	31.0175	31.0175
T-ZYX	CLVS2	31.0611	31.0611	31.0393
C-LR	PIK3C2G	24.2879
C-LR	PIK3C2G	27.8168	27.8168
C-LR	PIK3C2G	29.9241	29.9241	28.8705
C-MWJ	PIK3C2G	30.4779
C-MWJ	PIK3C2G	30.6013	30.6013
C-MWJ	PIK3C2G	30.7125	30.7125	30.6569
C-TJ	PIK3C2G	28.0679
C-TJ	PIK3C2G	28.3993	28.3993
C-TJ	PIK3C2G	28.3561	28.3561	28.3777
C-ZSQ	PIK3C2G	32.4415	32.4415
C-ZSQ	PIK3C2G	32.1362	32.1362
C-ZSQ	PIK3C2G	31.7064		32.2889
T-HB	PIK3C2G	Undetermined	Undetermined
T-HB	PIK3C2G	37.068	37.068
T-HB	PIK3C2G	35.6408	35.6408	36.3544
T-WHL	PIK3C2G	32.4081	32.4081
T-WHL	PIK3C2G	32.3444	32.3444
T-WHL	PIK3C2G	34.4373		32.3762
T-YSM	PIK3C2G	31.391	31.391
T-YSM	PIK3C2G	31.815	31.815
T-YSM	PIK3C2G	30.9041		31.603
T-ZYX	PIK3C2G	Undetermined	Undetermined
T-ZYX	PIK3C2G	34.2812	34.2812
T-ZYX	PIK3C2G	Undetermined	Undetermined	34.2812
C-LR	SIGLEC14	31.9641	31.9641
C-LR	SIGLEC14	31.963	31.963
C-LR	SIGLEC14	32.1074		31.9635
C-MWJ	SIGLEC14	32.4456	32.4456
C-MWJ	SIGLEC14	32.582	32.582
C-MWJ	SIGLEC14	32.2511		32.5138
C-TJ	SIGLEC14	36.1936	36.1936
C-TJ	SIGLEC14	37.0244	37.0244
C-TJ	SIGLEC14	34.9661		36.609
C-ZSQ	SIGLEC14	33.8652	33.8652
C-ZSQ	SIGLEC14	33.9537	33.9537
C-ZSQ	SIGLEC14	34.8564		33.9095
T-HB	SIGLEC14	Undetermined	Undetermined
T-HB	SIGLEC14	Undetermined	Undetermined
T-HB	SIGLEC14	Undetermined	Undetermined
T-WHL	SIGLEC14	33.3556
T-WHL	SIGLEC14	33.0617	33.0617
T-WHL	SIGLEC14	33.019	33.019	33.0404
T-YSM	SIGLEC14	Undetermined	Undetermined
T-YSM	SIGLEC14	Undetermined	Undetermined
T-YSM	SIGLEC14	Undetermined	Undetermined
T-ZYX	SIGLEC14	Undetermined	Undetermined
T-ZYX	SIGLEC14	Undetermined	Undetermined
T-ZYX	SIGLEC14	Undetermined	Undetermined

## Sheet: Figure5C-D1
raw data					Calculation process					Target：MAB21L1	ΔCT	con	ΔΔCT	2^(-ΔΔCT)
Groups	Targets	CT			Name	Targets	CT mean	ΔCT		C-CZL	-2.00399	-2.00399	0	1
C-CZL	ACTIN	32.7313			C-CZL	MAB21L1	32.46	-2.00399		T-WHL	0.700472	-2.00399	2.70446	0.153418
C-CZL	MAB21L1	32.2514			C-CZL	PIK3C2G	Undetermined			C-ZCY	-2.63871	-2.63871	0	1
C-CZL	PIK3C2G	Undetermined			C-CZL	RSPO	28.8807	-5.58333		C-WF	0.638609	-2.63871	3.27732	0.103141
C-CZL	RSPO	32.0547			C-CZL	ALPL	31.6948	-2.76921		T-HB	-2.10723	-2.63871	0.531471	0.691849
C-CZL	ALPL	34.3412			C-CZL	CP	Undetermined			T-QJH	5.08211	-2.63871	7.72082	0.00474027
C-CZL	CP	34.7691			C-CZL	GPX3	33.7516	-0.712437
C-CZL	GPX3	33.5132			C-CZL	SERP1N	Undetermined			Target：SERPINA3	ΔCT	con	ΔΔCT	2^(-ΔΔCT)
C-CZL	SERP1N	31.1808			C-CZL	ACAN	37.0046	2.54059		C-CZL	2.54059	2.54059	0	1
C-CZL	ACAN	Undetermined			C-CZL	AGT	32.6128	-1.85121		T-WHL	2.78354	2.54059	0.242949	0.845017
C-CZL	AGT	32.1293			C-WF	MAB21L1	28.2676	0.638609		C-ZCY	1.71353	1.71353	0	1
C-WF	ACTIN	27.4882			C-WF	PIK3C2G	Undetermined			C-WF	5.36966	1.71353	3.65613	0.0793222
C-WF	MAB21L1	28.2561			C-WF	RSPO	25.1735	-2.4555		T-QJH	-1.2496	1.71353	-2.96313	7.79813
C-WF	PIK3C2G	Undetermined			C-WF	ALPL	Undetermined
C-WF	RSPO	28.619			C-WF	CP	Undetermined			Target：PIK3C2G	ΔCT	con	ΔΔCT	2^(-ΔΔCT)
C-WF	ALPL	Undetermined			C-WF	GPX3	Undetermined			C-ZCY	6.39494	6.39494	0	1
C-WF	CP	Undetermined			C-WF	SERP1N	32.9986	5.36966		T-QJH	9.24281	6.39494	2.84787	0.138901
C-WF	GPX3	Undetermined			C-WF	ACAN	Undetermined
C-WF	SERP1N	30.1096			C-WF	AGT	30.2497	2.62077		Target：RSPO1	ΔCT	con	ΔΔCT	2^(-ΔΔCT)
C-WF	ACAN	Undetermined			C-ZCY	MAB21L1	27.9099	-2.63871		C-CZL	-5.58333	-5.58333	0	1
C-WF	AGT	29.4311			C-ZCY	PIK3C2G	36.9436	6.39494		T-WHL	-2.71405	-5.58333	2.86928	0.136855
C-ZCY	ACTIN	29.9565			C-ZCY	RSPO	29.0431	-1.50554		C-ZCY	-1.50554	-1.50554	0	1
C-ZCY	MAB21L1	28.0376			C-ZCY	ALPL	34.2039	3.65528		C-WF	-2.4555	-1.50554	-0.949955	1.93181
C-ZCY	PIK3C2G	36.9571			C-ZCY	CP	35.9208	5.37216		T-HB	-0.0584412	-1.50554	1.4471	0.366757
C-ZCY	RSPO	34.4332			C-ZCY	GPX3	34.9224	4.37373		T-QJH	9.03502	-1.50554	10.5406	0.000671389
C-ZCY	ALPL	36.9221			C-ZCY	SERP1N	32.2622	1.71353
C-ZCY	CP	35.9272			C-ZCY	ACAN	Undetermined			Target：GPX3	ΔCT	con	ΔΔCT	2^(-ΔΔCT)
C-ZCY	GPX3	36.9355			C-ZCY	AGT	31.7689	1.22025		C-CZL	-0.712437	-0.712437	0	1
C-ZCY	SERP1N	29.2061			T-HB	MAB21L1	34.8578	-2.10723		T-WHL	3.63637	-0.712437	4.34881	0.049077
C-ZCY	ACAN	36.9423			T-HB	PIK3C2G	Undetermined			C-ZCY	4.37373	4.37373	0	1
C-ZCY	AGT	30.9324			T-HB	RSPO	36.9066	-0.0584412		T-QJH	4.4611	4.37373	0.0873699	0.941237
T-HB	ACTIN	36.9739			T-HB	ALPL	Undetermined
T-HB	MAB21L1	34.8965			T-HB	CP	Undetermined
T-HB	PIK3C2G	Undetermined			T-HB	GPX3	Undetermined
T-HB	RSPO	Undetermined			T-HB	SERP1N	Undetermined
T-HB	ALPL	Undetermined			T-HB	ACAN	Undetermined
T-HB	CP	Undetermined			T-HB	AGT	Undetermined
T-HB	GPX3	Undetermined			T-WHL	MAB21L1	32.6666	0.700472
T-HB	SERP1N	37.1933			T-WHL	PIK3C2G	Undetermined
T-HB	ACAN	Undetermined			T-WHL	RSPO	29.2521	-2.71405
T-HB	AGT	Undetermined			T-WHL	ALPL	37.0395	5.07338
T-WHL	ACTIN	30.9616			T-WHL	CP	33.6375	1.67129
T-WHL	MAB21L1	31.9657			T-WHL	GPX3	35.6025	3.63637
T-WHL	PIK3C2G	Undetermined			T-WHL	SERP1N	34.7497	2.78354
T-WHL	RSPO	33.9652			T-WHL	ACAN	Undetermined
T-WHL	ALPL	Undetermined			T-WHL	AGT	32.9169	0.950743
T-WHL	CP	33.9014			T-QJH	MAB21L1	29.1816	5.08211
T-WHL	GPX3	34.7556			T-QJH	PIK3C2G	33.3423	9.24281
T-WHL	SERP1N	32.3763			T-QJH	RSPO	33.1345	9.03502
T-WHL	ACAN	Undetermined			T-QJH	ALPL	28.9964	4.89694
T-WHL	AGT	31.99			T-QJH	CP	30.8257	6.72626
T-QJH	ACTIN	23.9209			T-QJH	GPX3	28.5605	4.4611
T-QJH	MAB21L1	29.1463			T-QJH	SERP1N	22.8498	-1.2496
T-QJH	PIK3C2G	32.9456			T-QJH	ACAN	31.9464	7.84693
T-QJH	RSPO	35.9472			T-QJH	AGT	25.7883	1.68885
T-QJH	ALPL	31.3127
T-QJH	CP	31.1036
T-QJH	GPX3	28.0782
T-QJH	SERP1N	20.2012
T-QJH	ACAN	31.5593
T-QJH	AGT	25.2072

## Sheet: Figure5C-D2
raw data					Calculation process					Target：PIK3C2G	ΔCT	con	ΔΔCT	2^(-ΔΔCT)
Groups	Targets	CT			Name	Targets	CT mean	ΔCT		C-ZCY	7.00055	7.00055	0	1
C-CZL	ACTIN	32.7313			C-CZL	MAB21L1	32.2514	-0.479969		T-QJH	9.02472	7.00055	2.02417	0.245847
C-CZL	MAB21L1	32.2514			C-CZL	PIK3C2G	Undetermined
C-CZL	PIK3C2G	Undetermined			C-CZL	RSPO	32.0547	-0.676647		Target：RSPO1	ΔCT	con	ΔΔCT	2^(-ΔΔCT)
C-CZL	RSPO	32.0547			C-CZL	ALPL	34.3412	1.60992		C-CZL	-0.676647	-0.676647	0	1
C-CZL	ALPL	34.3412			C-CZL	CP	34.7691	2.03782		T-WHL	3.00354	-0.676647	3.68019	0.0780106
C-CZL	CP	34.7691			C-CZL	GPX3	33.5132	0.781872		C-ZCY	4.47668	4.47668	0	1
C-CZL	GPX3	33.5132			C-CZL	SERP1N	31.1808	-1.55048		C-WF	1.13083	4.47668	-3.34585	10.1672
C-CZL	SERP1N	31.1808			C-CZL	ACAN	Undetermined			T-QJH	12.0263	4.47668	7.54958	0.00533764
C-CZL	ACAN	Undetermined			C-CZL	AGT	32.1293	-0.602032
C-CZL	AGT	32.1293			C-WF	MAB21L1	28.2561	0.767912		Target：GPX3	ΔCT	con	ΔΔCT	2^(-ΔΔCT)
C-WF	ACTIN	27.4882			C-WF	PIK3C2G	Undetermined			C-CZL	0.781872	0.781872	0	1
C-WF	MAB21L1	28.2561			C-WF	RSPO	28.619	1.13083		T-WHL	3.79402	0.781872	3.01215	0.123952
C-WF	PIK3C2G	Undetermined			C-WF	ALPL	Undetermined			C-ZCY	6.97897	6.97897	0	1
C-WF	RSPO	28.619			C-WF	CP	Undetermined			T-QJH	4.15734	6.97897	-2.82163	7.06962
C-WF	ALPL	Undetermined			C-WF	GPX3	Undetermined
C-WF	CP	Undetermined			C-WF	SERP1N	30.1096	2.62144		Target：MAB21L1	ΔCT	con	ΔΔCT	2^(-ΔΔCT)
C-WF	GPX3	Undetermined			C-WF	ACAN	Undetermined			C-CZL	-0.479969	-0.479969	0	1
C-WF	SERP1N	30.1096			C-WF	AGT	29.4311	1.94292		T-WHL	1.00408	-0.479969	1.48405	0.357484
C-WF	ACAN	Undetermined			C-ZCY	MAB21L1	28.0376	-1.91895		C-ZCY	-1.91895	-1.91895	0	1
C-WF	AGT	29.4311			C-ZCY	PIK3C2G	36.9571	7.00055		C-WF	0.767912	-1.91895	2.68686	0.155301
C-ZCY	ACTIN	29.9565			C-ZCY	RSPO	34.4332	4.47668		T-HB	-2.07734	-1.91895	-0.158388	1.11604
C-ZCY	MAB21L1	28.0376			C-ZCY	ALPL	36.9221	6.96561		T-QJH	5.22536	-1.91895	7.14431	0.00706883
C-ZCY	PIK3C2G	36.9571			C-ZCY	CP	35.9272	5.97071
C-ZCY	RSPO	34.4332			C-ZCY	GPX3	36.9355	6.97897		Target：SERP1NA3	ΔCT	con	ΔΔCT	2^(-ΔΔCT)
C-ZCY	ALPL	36.9221			C-ZCY	SERP1N	29.2061	-0.750389		C-CZL	-1.55048	-1.55048	0	1
C-ZCY	CP	35.9272			C-ZCY	ACAN	36.9423	6.98581		T-WHL	1.41467	-1.55048	2.96515	0.128056
C-ZCY	GPX3	36.9355			C-ZCY	AGT	30.9324	0.975868		C-ZCY	-0.750389	-0.750389
C-ZCY	SERP1N	29.2061			T-HB	MAB21L1	34.8965	-2.07734		C-WF	2.62144	-0.750389	3.37183	0.0966001
C-ZCY	ACAN	36.9423			T-HB	PIK3C2G	Undetermined			T-HB	0.219387	-0.750389	0.969776	0.510585
C-ZCY	AGT	30.9324			T-HB	RSPO	Undetermined			T-QJH	-3.7197	-0.750389	-2.96931	7.83161
T-HB	ACTIN	36.9739			T-HB	ALPL	Undetermined
T-HB	MAB21L1	34.8965			T-HB	CP	Undetermined
T-HB	PIK3C2G	Undetermined			T-HB	GPX3	Undetermined
T-HB	RSPO	Undetermined			T-HB	SERP1N	37.1933	0.219387
T-HB	ALPL	Undetermined			T-HB	ACAN	Undetermined
T-HB	CP	Undetermined			T-HB	AGT	Undetermined
T-HB	GPX3	Undetermined			T-WHL	MAB21L1	31.9657	1.00408
T-HB	SERP1N	37.1933			T-WHL	PIK3C2G	Undetermined
T-HB	ACAN	Undetermined			T-WHL	RSPO	33.9652	3.00354
T-HB	AGT	Undetermined			T-WHL	ALPL	Undetermined
T-WHL	ACTIN	30.9616			T-WHL	CP	33.9014	2.93973
T-WHL	MAB21L1	31.9657			T-WHL	GPX3	34.7556	3.79402
T-WHL	PIK3C2G	Undetermined			T-WHL	SERP1N	32.3763	1.41467
T-WHL	RSPO	33.9652			T-WHL	ACAN	Undetermined
T-WHL	ALPL	Undetermined			T-WHL	AGT	31.99	1.02834
T-WHL	CP	33.9014			T-QJH	MAB21L1	29.1463	5.22536
T-WHL	GPX3	34.7556			T-QJH	PIK3C2G	32.9456	9.02472
T-WHL	SERP1N	32.3763			T-QJH	RSPO	35.9472	12.0263
T-WHL	ACAN	Undetermined			T-QJH	ALPL	31.3127	7.39183
T-WHL	AGT	31.99			T-QJH	CP	31.1036	7.18269
T-QJH	ACTIN	23.9209			T-QJH	GPX3	28.0782	4.15734
T-QJH	MAB21L1	29.1463			T-QJH	SERP1N	20.2012	-3.7197
T-QJH	PIK3C2G	32.9456			T-QJH	ACAN	31.5593	7.6384
T-QJH	RSPO	35.9472			T-QJH	AGT	25.2072	1.28625
T-QJH	ALPL	31.3127
T-QJH	CP	31.1036
T-QJH	GPX3	28.0782
T-QJH	SERP1N	20.2012
T-QJH	ACAN	31.5593
T-QJH	AGT	25.2072
